# Supplementary material for: Hydrogen bonding promoting the controlled radical polymerization of 2-vinyl pyridine: supramonomer for better control
Source: Royal Society of Chemistry journal article supplement (doi:10.1039/c5py00046g), 2015-01-01
Supplement: c5py00046g1.pdf [file c5py00046g1.pdf]

## Electronic Supplementary Information (ESI)

### Hydrogen Bonding Promoting Controlled Radical Polymerization of 2-Vinyl Pyridine: Supramonomer for a Better Control

Huaqiao Wu,<sup>1</sup> Yingbo Wan,<sup>1</sup> Wenxiang Wang,<sup>1,2</sup> Yong Wang, Nianchen Zhou,<sup>1</sup> Wei  
Zhang,<sup>1</sup> Xiaohong Li,<sup>1\*</sup> Zhengbiao Zhang,<sup>1\*</sup> Xiulin Zhu<sup>1</sup>

*Jiangsu Key Laboratory of Advanced Functional Polymer Design and Application,  
Department of Polymer Science and Engineering, College of Chemistry, Chemical  
Engineering and Materials Science, Soochow University, Suzhou 215123, China.*

*Tel/Fax: 86-512-6588-2787.*

\*To whom correspondence should be addressed. E-mail: lxh83@suda.edu.cn;  
[zhangzhengbiao@suda.edu.cn](mailto:zhangzhengbiao@suda.edu.cn)

### Experimental section

#### Materials.

2-Vinylpyridine (2VP, 98%, J & K Scientific LTD.) and 4-vinylpyridine (4VP, 95%, J & K Scientific LTD.) were distilled under reduced pressure. 3-Vinylpyridine (3VP) and 2-vinylpyrazine (2VPZ) were purchased from Longrepharm Laboratories (China), Ltd. and used as received. Ethyl-2-chloro-2-phenylacetate (ECPA)<sup>[S1]</sup> and tris[2-(dimethylamino)ethyl] amine (Me<sub>6</sub>TREN) were synthesized according to literature.<sup>[S2]</sup> Copper (75 mm powder, 99%) was purchased from Sigma-Aldrich Co..

1,1,1,3,3,3-Hexafluoro-2-propanol (HFIP, 99.5%) was obtained from Ji'Nan WeiDu Chemical Co. (China). Perfluoro tert-butanol (PFTB, 98%) and 1,1,1,3,3,3-hexafluoro-2-phenyl-2-propanol (HFPP, 99%) were purchased from J & K Scientific Ltd. (China). 2,2,3,3,4,4,5,5-Octafluoro-1-pentanol (OFNP, 98%) was purchased from Alfa Aesar (ShangHai, China). 2,2,3,3-Tetrafluoro-1-propanol (TFP, 98%) was purchased from Energy Chemical Co. (ShangHai, China). 2,2,2-Trifluoroethanol (TFE, 98%) was purchased from Aladdin Chemical Co. (ShangHai, China). Dimethyl sulfoxide (DMSO, 99.9%), N,N-dimethylformamide (DMF, 99.9%) and N-methyl-2-pyrrolidone (NMP, 99.9%) were purchased from Shanghai Chemical Reagents and were purified by vacuum distillation before use. 2-Propanol (99%) was purchased from Shanghai Chemical Reagents and was dried using 4Å molecular sieve before use. All other chemicals were obtained from Shanghai Chemical Reagents and used as received unless mentioned.

### **Typical procedures for Cu(0)-mediated CRP of 2VP.**

The monomer (2VP, 1.0 mL, 9.3 mmol), initiator (ECPA, 7.8µL, 0.046 mmol), catalyst (Cu(0), 3.0 mg, 0.047 mmol), and solvent (HFIP, 1.0 mL) were added to a 5 mL-ampoule in the following order: Cu(0), 2VP, HFIP and ECPA. The solution was deoxygenated with six standard freeze-pump-thaw cycles. The ampoule was then flame sealed and placed in a stirred water bath equipped with a thermostat at 25±1°C. After a predetermined time, the ampoule was cooled by immersion in iced water.

Afterwards, the ampoule was opened and the contents were dissolved in 5 mL of THF, then the solution was washed with saturated base solution (NaOH). The solution was passed through a small basic Al<sub>2</sub>O<sub>3</sub> chromatographic column to remove any residual Cu(0) powder and Cu-ion compounds. The resulting solution was precipitated into 200 mL of cool n-hexane with stirring. The polymer was isolated by filtration and dried under vacuum until a constant weight at room temperature. The monomer conversion was determined by gravimetric calculation. The  $M_n$  and  $M_w/M_n$  values were determined by SEC with dimethyl formamide as elution and polystyrene as standards.

### **Characterization**

The number-average molecular weight ( $M_{n,SEC}$ ) and molecular weight distribution ( $M_w/M_n$ ) values of the resultant polymers were determined using a Waters 1515 size exclusion chromatograph (SEC) equipped with a refractive-index detector (Waters 2414), using HR 1 (pore size: 100 Å, 100–5000 Da), HR 2 (pore size: 500 Å, 500–20 000 Da), and HR 4 (pore size 10 000 Å, 50–100 000 Da) columns (7.8×300 mm, 5µm beads size) with molecular weights ranging from 10<sup>2</sup> to 5 ×10<sup>5</sup>g/mol. DMF was used as the eluent at a flow rate of 1.0 mL/min at 30°C. SEC samples were injected using a Waters 717 plus autosampler and calibrated with poly(styrene) standards purchased from Waters. All the <sup>1</sup>H NMR spectra were collected on an Agilent Direct-Drive II 600MHz spectrometer equipped with four broad-band rf channels and a 5 mm <sup>1</sup>H-<sup>19</sup>F/<sup>15</sup>N-<sup>31</sup>P pulse field gradient (PFG) probe. In general, during the acquisition periods, <sup>1</sup>H was decoupled with Waltz-16 ( $\gamma_H B_H/2\pi = 4.73$  kHz) and WURST-40

( $\gamma_{\text{C}}\text{B}_\text{C}/2\pi = 8.77$  kHz) decoupler modulation, respectively. 10  $\mu\text{L}$  of samples were dissolved in about 0.6 mL of  $\text{CDCl}_3$  with TMS as a chemical shift reference in the  $^1\text{H}$  (0 ppm) NMR spectra.

### Cartesian coordinates of optimized geometries

#### Structure 2VP

|   |             |             |            |
|---|-------------|-------------|------------|
| C | 0.66815100  | -2.11987700 | 0.00000000 |
| C | -0.64697700 | -1.66224100 | 0.00000000 |
| C | 0.00000000  | 0.53969900  | 0.00000000 |
| C | 1.34929800  | 0.16816000  | 0.00000000 |
| C | 1.68580100  | -1.17691200 | 0.00000000 |
| H | 0.87942000  | -3.18155100 | 0.00000000 |
| H | -1.47134600 | -2.36978500 | 0.00000000 |
| H | 2.11802900  | 0.93151500  | 0.00000000 |
| H | 2.72517000  | -1.48335600 | 0.00000000 |
| C | -0.36904300 | 1.96276100  | 0.00000000 |
| C | -1.61597700 | 2.42843000  | 0.00000000 |
| H | 0.46405600  | 2.65974000  | 0.00000000 |
| H | -1.81550400 | 3.49231500  | 0.00000000 |
| H | -2.46179500 | 1.75262600  | 0.00000000 |
| N | -0.98079300 | -0.37737600 | 0.00000000 |

#### Structure 2VP-HFIP

|   |             |             |             |
|---|-------------|-------------|-------------|
| C | -3.63910200 | -1.90825200 | -0.10763600 |
| C | -2.38403200 | -1.38707300 | -0.39219000 |
| C | -3.04591900 | 0.77297300  | 0.09115600  |
| C | -4.33106800 | 0.31852700  | 0.40608300  |
| C | -4.63104500 | -1.03022100 | 0.30458900  |
| H | -3.82265900 | -2.97011000 | -0.20301300 |
| H | -1.57407100 | -2.03620600 | -0.70651600 |
| H | -5.08404800 | 1.02979800  | 0.72127200  |
| H | -5.62472700 | -1.38986500 | 0.54314100  |
| C | -2.75133800 | 2.20868900  | 0.17914400  |
| C | -1.64655200 | 2.82158200  | -0.24147600 |
| H | -3.54628600 | 2.80303100  | 0.61941800  |
| H | -1.54055600 | 3.89347000  | -0.13308200 |
| H | -0.82309000 | 2.29521900  | -0.70499800 |
| N | -2.08756000 | -0.09118600 | -0.29472800 |

|   |             |             |             |
|---|-------------|-------------|-------------|
| O | 0.55251200  | 0.18028100  | -0.99138500 |
| C | 1.36893700  | -0.01022300 | 0.11101500  |
| H | 0.83958000  | 0.10670700  | 1.06419600  |
| C | 1.93152100  | -1.44683500 | 0.11317700  |
| C | 2.46628100  | 1.06969300  | 0.09883800  |
| F | 2.67967300  | -1.71653800 | -0.95946700 |
| F | 0.89997900  | -2.31827600 | 0.11860200  |
| F | 2.66641900  | -1.70049200 | 1.20853100  |
| F | 3.31466600  | 0.93344000  | 1.13283700  |
| F | 1.89330600  | 2.28206900  | 0.20916000  |
| F | 3.18471300  | 1.06084300  | -1.02720000 |
| H | -0.40624000 | 0.14143700  | -0.72461300 |

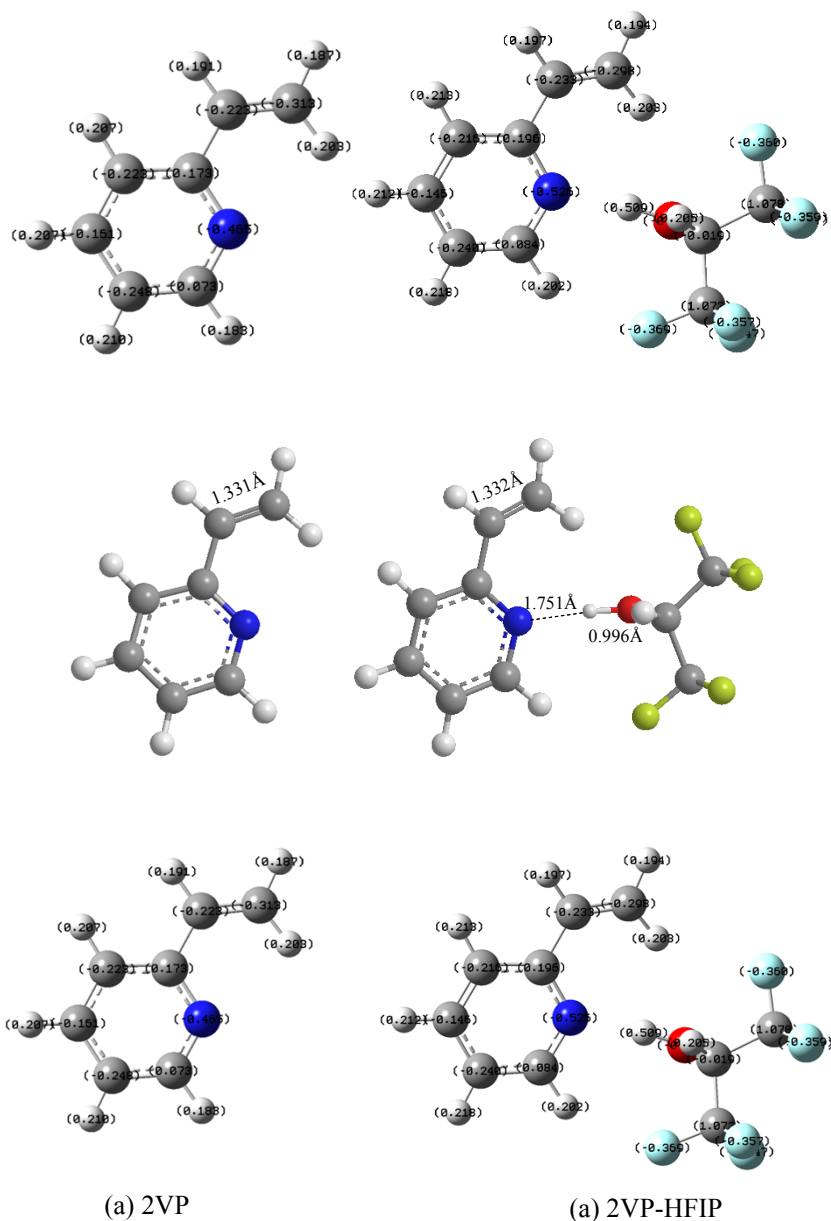

Figure S1. The NBO charges of the 2VP (a) and 2VP-HFIP (b) at the level of B3LYP/6-311++G(2df,p).

Computational Details: With Gaussian03 programs,[S3] we employed density functional theory with the three-parameter hybrid functional (B3LYP) with no symmetry constraints to investigate the optimized geometries of 2VP and 2VP-HFIP with a 6-311++G(2df,p) basis set. The charges calculated by the natural population analysis (NPA) are obtained by using the NBO program[S4] as implemented in Gaussian 03.

#### Structure 2VP•

|   |             |             |             |
|---|-------------|-------------|-------------|
| C | -1.91265500 | 0.93479800  | 0.00006700  |
| C | -2.23351200 | -0.42618400 | 0.00008200  |
| C | -1.18234700 | -1.35026900 | 0.00002300  |
| C | 0.42843800  | 0.30536000  | -0.00009600 |
| C | -0.58202100 | 1.30705100  | -0.00001000 |
| H | -2.69432800 | 1.68648200  | 0.00011800  |
| H | -3.26196700 | -0.76595600 | 0.00013600  |
| H | -1.39954000 | -2.41608600 | 0.00001000  |
| H | -0.29575300 | 2.35282400  | -0.00000200 |
| N | 0.10254200  | -1.02134500 | -0.00006800 |
| C | 1.79969500  | 0.65372200  | -0.00010300 |
| H | 2.04682300  | 1.71018500  | 0.00003900  |
| C | 2.90338800  | -0.34745700 | 0.00000200  |
| H | 2.83897500  | -1.00999800 | -0.87130400 |
| H | 3.88097200  | 0.13728000  | -0.00177000 |
| H | 2.84110800  | -1.00743800 | 0.87345800  |

#### Structure 2VP•-HFIP

|   |             |             |             |
|---|-------------|-------------|-------------|
| C | -4.58504000 | -1.17583400 | 0.39067200  |
| C | -3.51917000 | -2.02466000 | 0.07610800  |
| C | -2.28845600 | -1.44602000 | -0.23597400 |
| C | -3.10237700 | 0.71706300  | 0.03439900  |
| C | -4.38054500 | 0.18891900  | 0.37157800  |
| H | -5.55808400 | -1.58154000 | 0.64346200  |
| H | -3.63029200 | -3.10131100 | 0.07278200  |
| H | -1.43662200 | -2.07339200 | -0.48058200 |
| H | -5.18612400 | 0.87496100  | 0.60522400  |
| N | -2.06572900 | -0.13286600 | -0.25641600 |
| C | -2.90640500 | 2.11512100  | -0.00936100 |
| H | -3.76173900 | 2.72351700  | 0.26686500  |
| C | 1.37631100  | -0.05009400 | 0.10791500  |
| H | 0.82926900  | -0.06077400 | 1.05896200  |
| O | 0.55740500  | 0.18026000  | -0.98668100 |

|   |             |             |             |
|---|-------------|-------------|-------------|
| H | -0.40032200 | 0.14781400  | -0.71314600 |
| C | 2.03429600  | -1.44246200 | -0.01256300 |
| C | 2.39543500  | 1.10192500  | 0.22054500  |
| F | 1.05984600  | -2.38066400 | -0.09163500 |
| F | 2.80489900  | -1.56920100 | -1.10014300 |
| F | 2.78346200  | -1.74601500 | 1.06654500  |
| F | 3.12682600  | 1.26063900  | -0.88992300 |
| F | 3.24414300  | 0.92715000  | 1.25481700  |
| F | 1.73213600  | 2.25815200  | 0.44294700  |
| C | -1.64306600 | 2.81372000  | -0.36915500 |
| H | -1.85116100 | 3.81999700  | -0.73962700 |
| H | -0.98757800 | 2.92794200  | 0.50579600  |
| H | -1.06418400 | 2.27416000  | -1.11982700 |

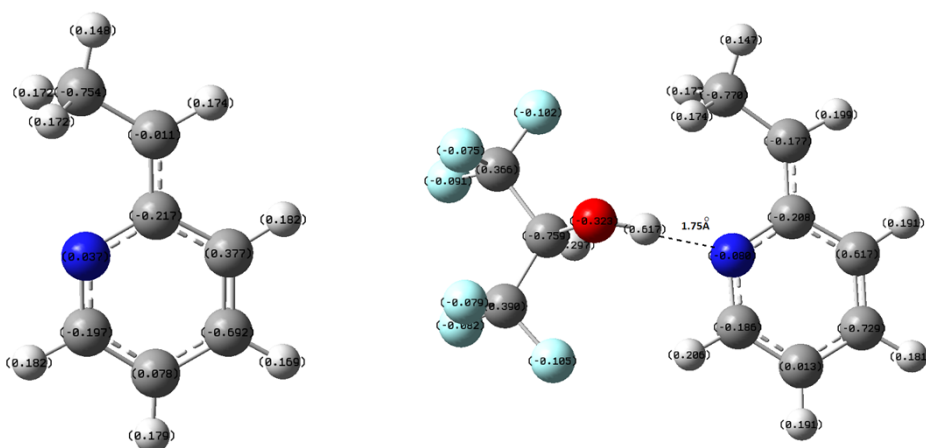

Figure S2. The NBO charges of the 2VP• (a) and 2VP•-HFIP (b) at the level of B3LYP/6-311++G(d,p) implemented in the GAUSSIAN 09 package.

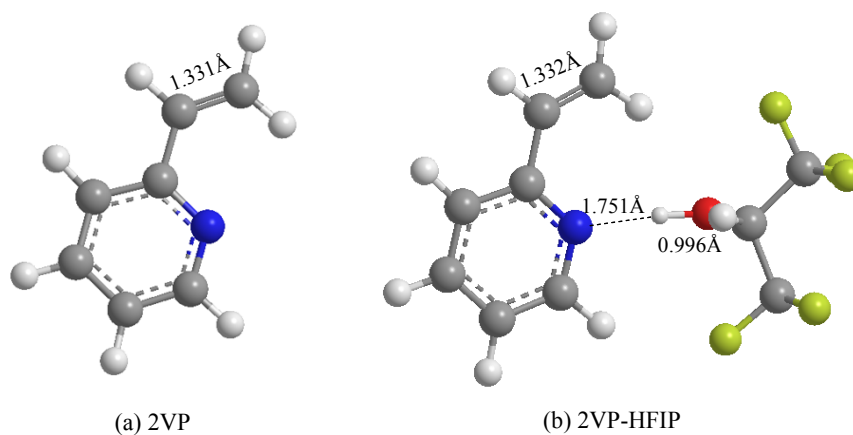

Figure S3. The optimized geometries of 2VP (a) and 2VP-HFIP (b) at the level of B3LYP/6-311++G(2df,p).

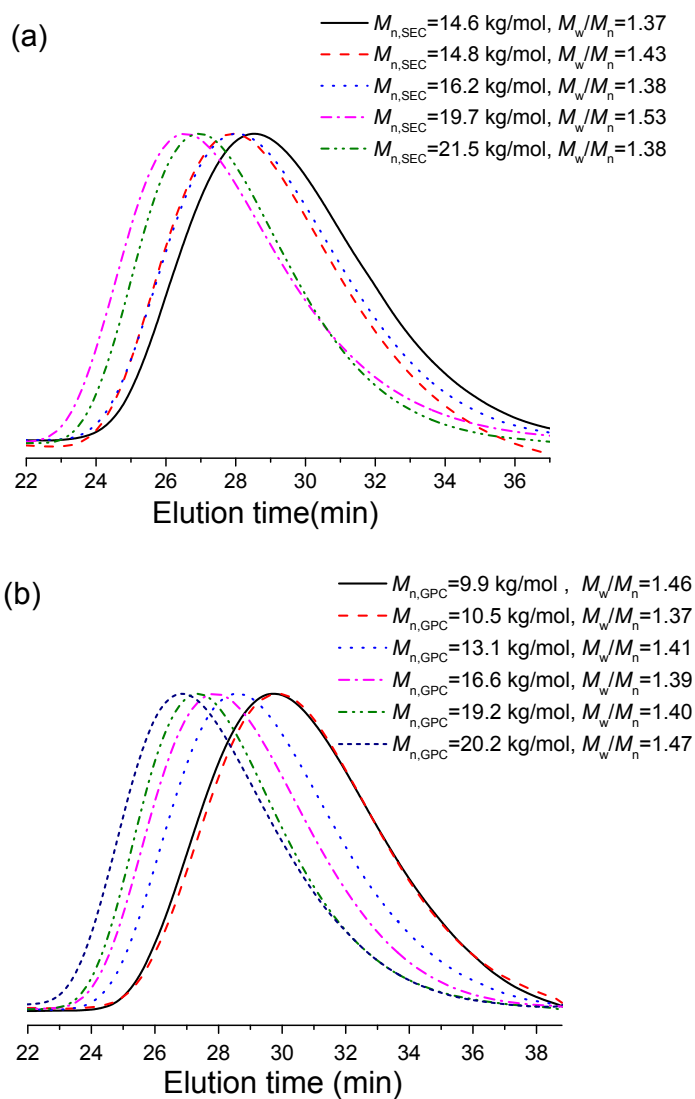



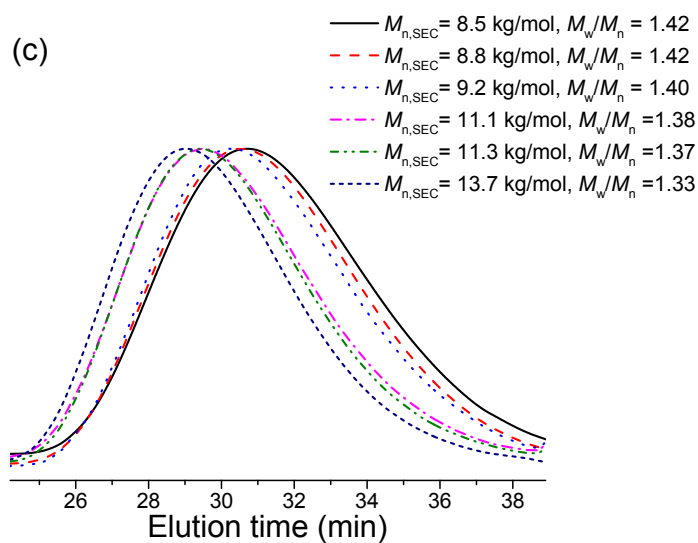

Figure S4. Evolution of SEC traces of the prepared P2VP in HFIP with  $[\text{HFIP}]_0/[\text{2VP}]_0 = 1/1$ ,  $[\text{2VP}]_0/[\text{ECPA}]_0/[\text{Cu(0)}]_0 = 200/1/1.25$ .  $T = 25 \text{ }^\circ\text{C}$  (a),  $40 \text{ }^\circ\text{C}$  (b) and  $60 \text{ }^\circ\text{C}$  (c).

The molecular weight ( $M_{n,NMR}$ ) of P2VP can be calculated from the integrals in

$^1\text{H}$  NMR, according to eq. S1:

$$M_{n,NMR} \text{ (g/mol)} = (I_{7.90-9.00}) \times 105.14 / (I_{3.6}) + 198.65 \quad (\text{S1})$$

where 105.14 and 198.65 are the molecular weights of 2VP and ECPA, respectively.

$I_{7.90-9.00}$  and  $I_{3.6}$  are the integration values of the protons from pyridyl groups of 2VP repeat units (a, 1H) and methylene from ECPA (f, 1H), respectively.

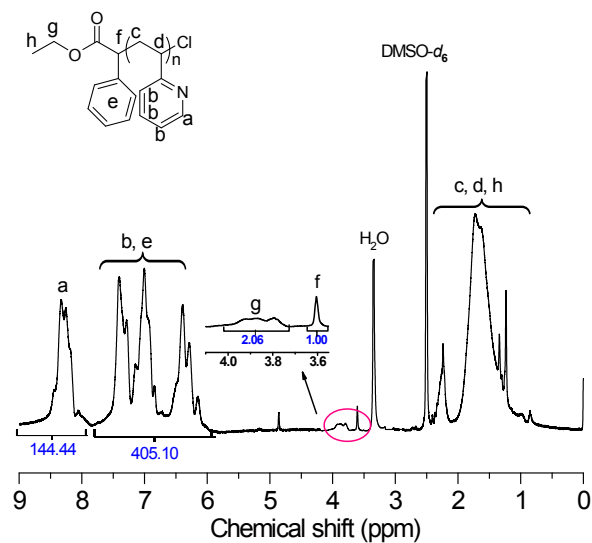

Figure S5.  $^1\text{H}$  NMR spectrum of P2VP ( $M_{n,SEC} = 1.48 \times 10^4$  g/mol,  $M_w/M_n = 1.43$ ). DMSO- $d_6$  was used as the solvent and tetramethylsilane (TMS) as an internal standard. Polymerization conditions:  $[2VP]_0/[ECPA]_0/[Cu(0)]_0 = 200/1/1$ ,  $[2VP]_0/[HFIP]_0 = 1.0/1.0$ , 2VP = 1.0 mL; time = 40 h, conversion = 53.0%; temperature = 25  $^\circ\text{C}$ .

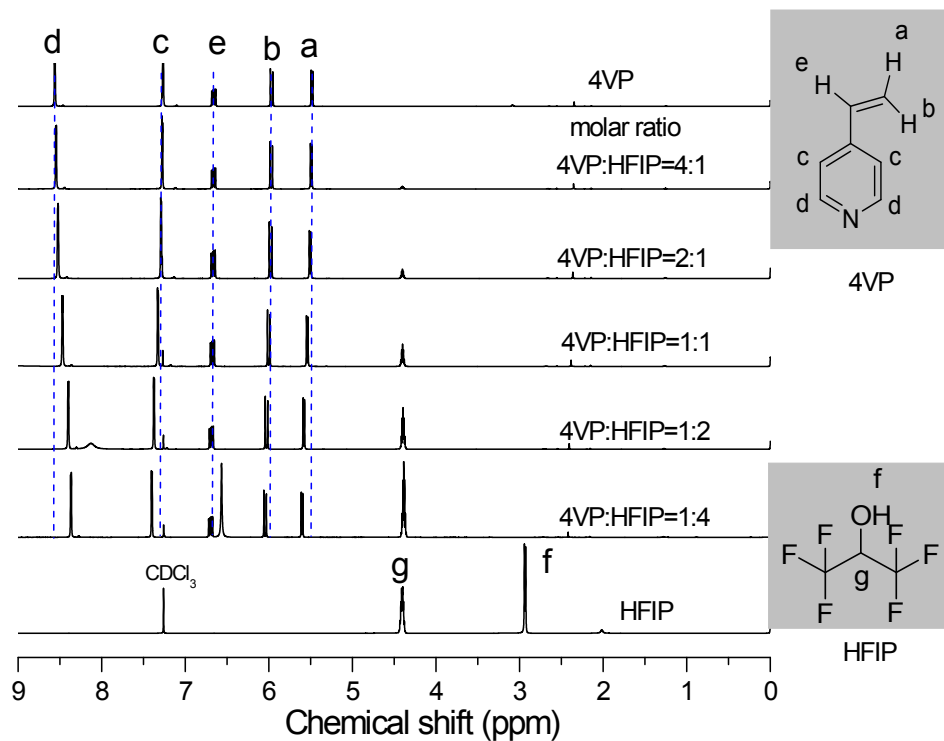

Figure S6.  $^1\text{H}$  NMR spectra of 4VP and HFIP at different molar ratios.

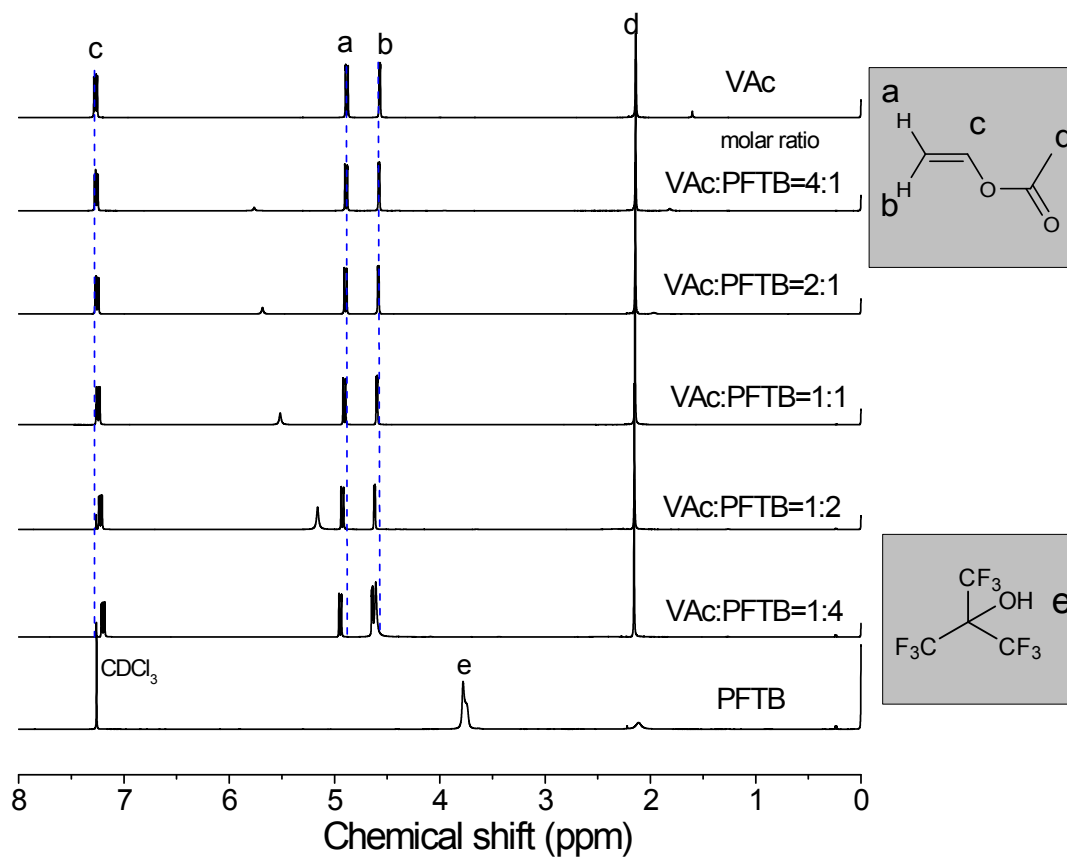

Figure S7.  $^1\text{H}$  NMR spectra of VAc and PFTB at different molar ratios.

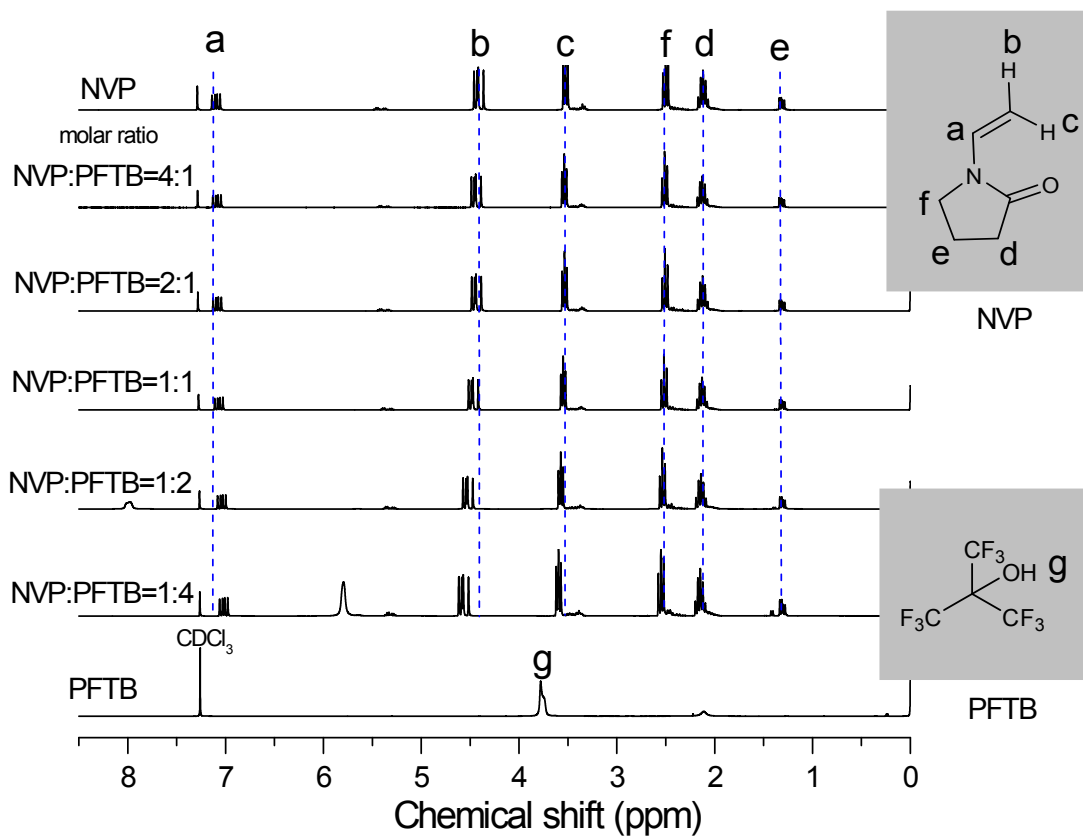

Figure S8.  $^1\text{H}$  NMR spectra of NVP and PFTB at different molar ratios.

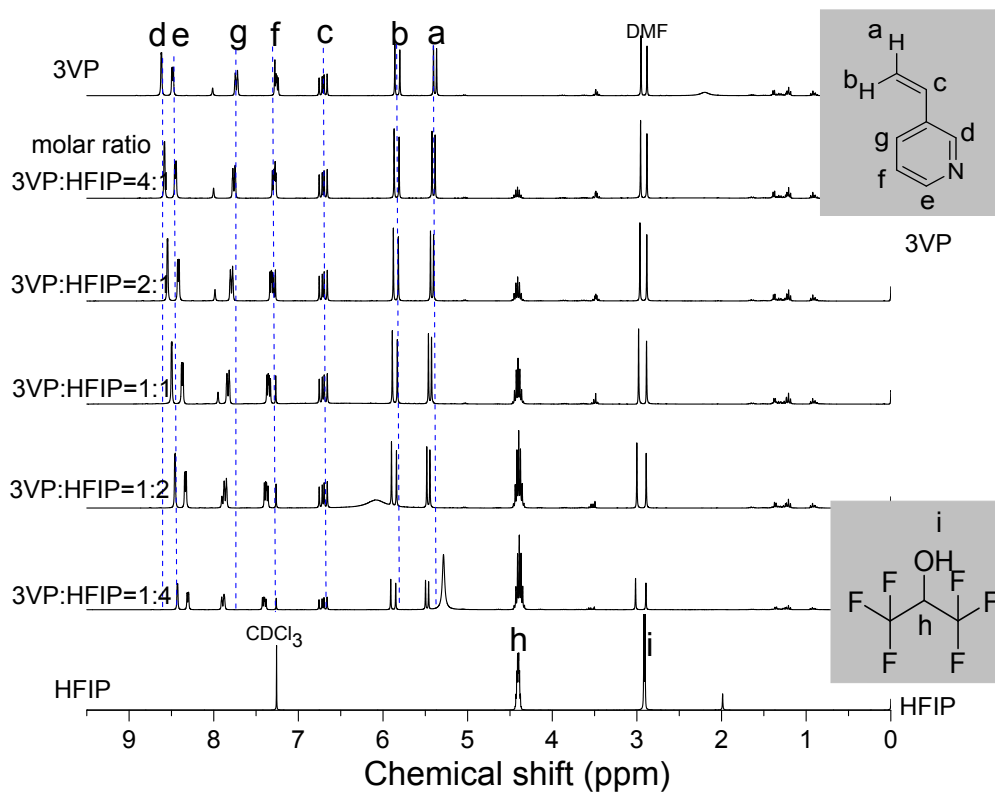

Figure S9.  $^1\text{H}$  NMR spectra of 3VP and HFIP at different molar ratios.

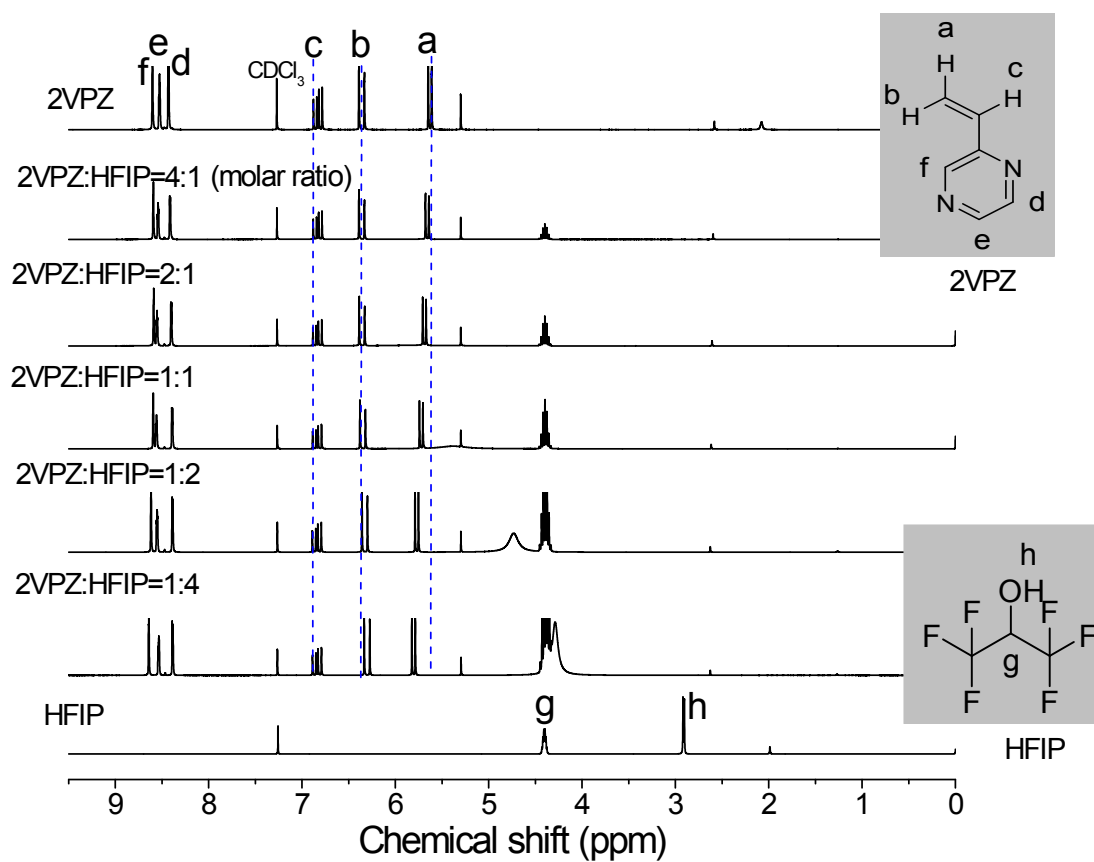

Figure S10.  $^1\text{H}$  NMR spectra of 2VPZ and HFIP at different molar ratios.

Table S1. Polymerization of 3VP and 2VPZ in different solvents.

| Entry <sup>a</sup> | Solvent                                                                                       | Time (h) | Conv. (%) | $M_{n,SEC}$ (kg/mol) | $M_w/M_n$ | $M_{n,th}$ (kg/mol) |
|--------------------|-----------------------------------------------------------------------------------------------|----------|-----------|----------------------|-----------|---------------------|
| 1                  | (CF <sub>3</sub> ) <sub>2</sub> CHOH = 0.50 mL                                                | 24       | 48.5      | 60.0                 | 1.76      | 10.4                |
| 2                  | (CF <sub>3</sub> ) <sub>3</sub> COH = 0.65 mL                                                 | 24       | 60.8      | 82.1                 | 1.81      | 13.0                |
| 3                  | CHF <sub>2</sub> CF <sub>2</sub> CF <sub>2</sub> CF <sub>2</sub> CH <sub>2</sub> OH = 0.65 mL | 24       | 53.7      | 64.5                 | 1.88      | 11.5                |
| 4                  | CHF <sub>2</sub> CF <sub>2</sub> CH <sub>2</sub> OH = 0.41 mL                                 | 24       | 50.1      | 71.7                 | 1.78      | 10.7                |
| 5                  | CF <sub>3</sub> CH <sub>2</sub> OH = 0.34 mL                                                  | 24       | 45.8      | 26.5                 | 1.64      | 9.8                 |
| 6                  | PhC(CF <sub>3</sub> ) <sub>2</sub> OH = 0.78 mL                                               | 24       | 59.8      | 77.9                 | 1.93      | 12.8                |
| 7                  | 2-propanol = 0.50 mL                                                                          | 24       | 9         | 17.1                 | 1.62      | 2.1                 |
| 8                  | toluene = 0.50 mL                                                                             | 42       | 34.3      | 13.7                 | 1.54      | 7.4                 |
| 9                  | DMF = 0.50 mL                                                                                 | 42       | 34.8      | 17.8                 | 1.73      | 7.5                 |
| 10                 | (CF <sub>3</sub> ) <sub>2</sub> CHOH = 0.98 mL                                                | 72       | 1.2       | 13.0                 | 1.08      | 0.5                 |
| 11                 | (CF <sub>3</sub> ) <sub>3</sub> COH = 1.30 mL                                                 | 72       | 0.8       | --                   | --        | --                  |
| 12                 | CHF <sub>2</sub> CF <sub>2</sub> CF <sub>2</sub> CF <sub>2</sub> CH <sub>2</sub> OH = 1.29 mL | 72       | 14.8      | 16.2                 | 1.35      | 3.3                 |
| 13                 | CHF <sub>2</sub> CF <sub>2</sub> CH <sub>2</sub> OH = 0.83 mL                                 | 72       | 22.6      | 20.0                 | 1.39      | 5.0                 |
| 14                 | CF <sub>3</sub> CH <sub>2</sub> OH = 0.68 mL                                                  | 72       | 26.0      | 22.7                 | 1.22      | 5.7                 |
| 15                 | PhC(CF <sub>3</sub> ) <sub>2</sub> OH = 1.56 mL                                               | 72       | 3.9       | --                   | --        | --                  |
| 16                 | 2-propanol = 1.00 mL                                                                          | 96       | 15.6      | 32.0                 | 1.45      | 3.5                 |
| 17                 | toluene = 1.00 mL                                                                             | 96       | 11.5      | 26.2                 | 1.27      | 2.6                 |
| 18                 | DMF = 1.00mL                                                                                  | 96       | 16.2      | 23.5                 | 1.32      | 3.6                 |

<sup>a</sup> 25 °C, entries 1-9: [3VP]<sub>0</sub>/[ECPA]<sub>0</sub>/[Cu(0)]<sub>0</sub> = 200/1/1, 3VP = 0.5 mL; entries 10-18: [2VPZ]<sub>0</sub>/[ECPA]<sub>0</sub>/[Cu(0)]<sub>0</sub> = 200/1/1, 2VPZ = 0.48 mL.

[S1] Baek, K.-Y.; Kamigaito, M.; Sawamoto, M. *Journal of Polymer Science Part A: Polymer Chemistry* **2002**, *40* (12), 1937-1944.

[S2] Ciampolini, M.; Nardi, N. *Inorganic Chemistry* **1966**, *5* (1), 41-44.

[S3] Frisch, M. J., et al. GAUSSIAN 03 (Revision B.04), Gaussian, Inc., Wallingford, CT, 2003. Frisch, M. J.; Trucks, G. W.; Schlegel, H. B.; Scuseria, G. E.; Robb, M. A.; Cheeseman, J. R.; Montgomery, J. A., Jr.; Vreven, T.; Kudin, K. N.; Burant, J. C.; Millam, J. M.; Iyengar, S. S.; Tomasi, J.; Barone, V.; Mennucci, B.; Cossi, M.; Scalmani, G.; Rega, N.; Petersson, G. A.; Nakatsuji, H.; Hada, M.; Ehara,

M.; Toyota, K.; Fukuda, R.; Hasegawa, J.; Ishida, M.; Nakajima, T.; Honda, Y.; Kitao, O.; Nakai, H.; Klene, M.; Li, X.; Knox, J. E.; Hratchian, H. P.; Cross, J. B.; Adamo, C.; Jaramillo, J.; Gomperts, R.; Stratmann, R. E.; Yazyev, O.; Austin, A. J.; Cammi, R.; Pomelli, C.; Ochterski, J. W.; Ayala, P. Y.; Morokuma, K.; Voth, G. A.; Salvador, P.; Dannenberg, J. J.; Zakrzewski, V. G.; Dapprich, S.; Daniels, A. D.; Strain, M. C.; Farkas, O.; Malick, D. K.; Rabuck, A. D.; Raghavachari, K.; Foresman, J. B.; Ortiz, J. V.; Cui, Q.; Baboul, A. G.; Clifford, S.; Cioslowski, J.; Stefanov, B. B.; Liu, G.; Liashenko, A.; Piskorz, P.; Komaromi, I.; Martin, R. L.; Fox, D. J.; Keith, T.; Al-Laham, M. A.; Peng, C. Y.; Nanayakkara, A.; Challacombe, M.; Gill, P. M. W.; Johnson, B.; Chen, W.; Wong, M. W.; Gonzalez, C.; Pople, J. A. *Gaussian 03*, Revision B.04; Gaussian, Inc.: Wallingford, CT, 2003.

[S4] Glendening, E. D.; Reed, A. E.; Carpenter, J. E.; Weinhold, F. NBO, Version 3.1, Gaussian, Inc., Pittsburgh PA, **2003**.
